# Supplementary material
Source: Elsevier journal article supplement (https://www.sciencedirect.com/science/article/pii/S1885585723000324)
Supplement: mmc1 [file mmc1.pdf]

SUPPLEMENTARY DATA

**Figure 1 of the supplementary data.** Office systolic blood-pressure between the intensive and standard treatment groups.

The systolic blood-pressure target was 110 mmHg to less than 130 mmHg in the intensive treatment group and 130 mmHg to less than 150 mmHg in the standard-treatment group. A: office systolic blood pressure in the intensive treatment group. B: office systolic blood-pressure in the standard treatment group.

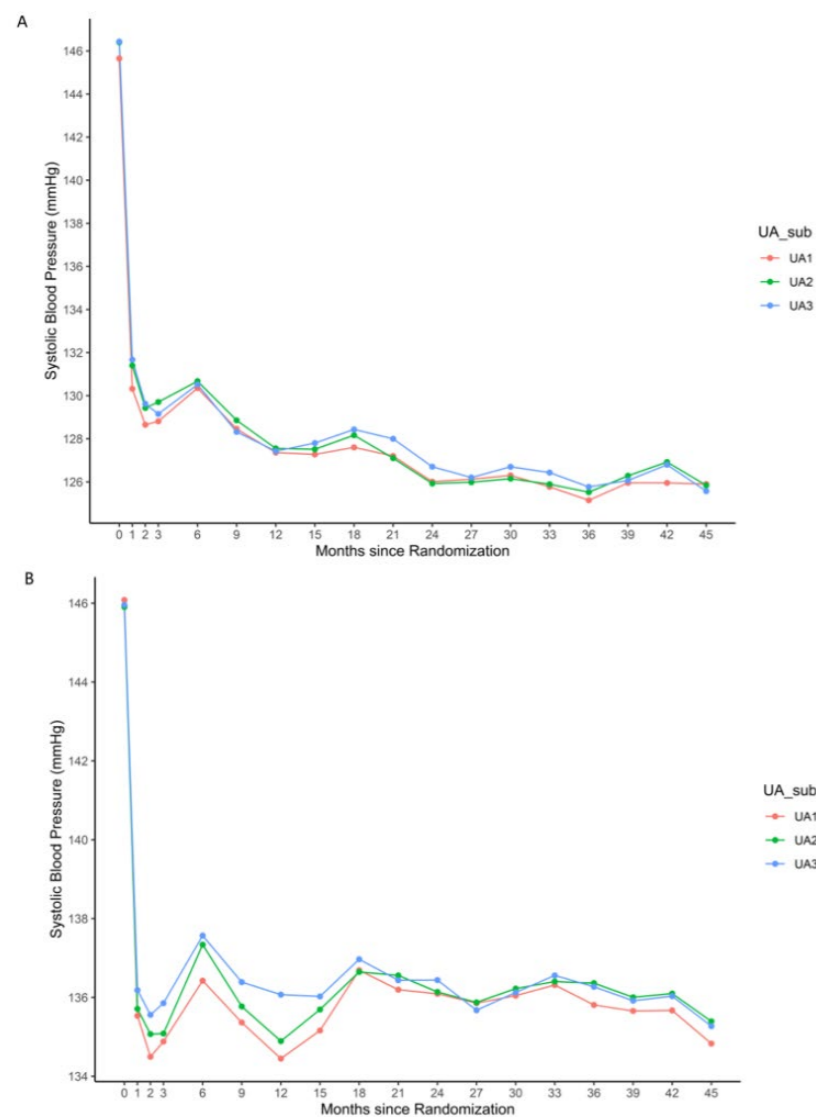

**Figure 2 of the supplementary data.** Office systolic blood pressure in the 3 tertiles of uric acid. The systolic blood-pressure target was 110 mmHg to less than 130 mmHg in the intensive treatment group and 130 mmHg to less than 150 mmHg in the standard treatment group. A, office systolic blood pressure in uric acid tertile 1; B, office systolic blood pressure in uric acid tertile 2; C, office systolic blood pressure in uric acid tertile 3.

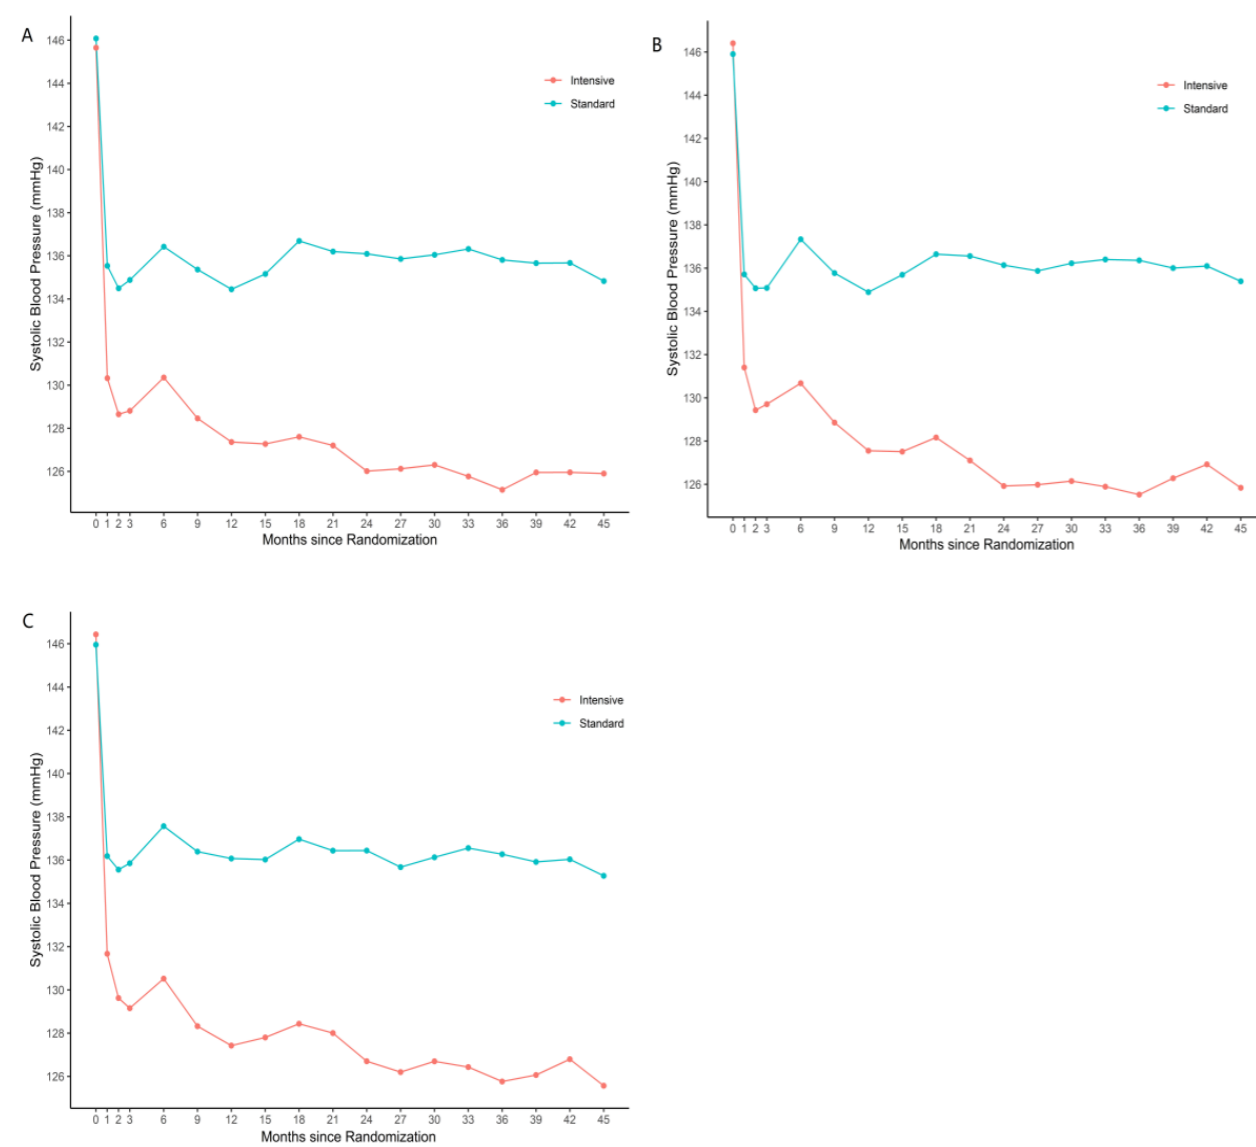

**Table 1 of the supplementary data.** Baseline characteristics of the STEP participants and of those in the intensive treatment group and standard treatment group

|                                                         | Overall<br>(n = 8294) | Intensive treatment<br>(n = 4132) | Standard treatment<br>(n = 4162) | P <sup>b</sup> |
|---------------------------------------------------------|-----------------------|-----------------------------------|----------------------------------|----------------|
| Age                                                     | 66.26 ± 4.83          | 66.23 ± 4.85                      | 66.28 ± 4.80                     | .619           |
| Male sex                                                | 3867 (46.6)           | 1944 (47.0)                       | 1923 (46.2)                      | .454           |
| BMI <sup>a</sup>                                        | 25.58 ± 3.16          | 25.56 ± 3.16                      | 25.61 ± 3.16                     | .432           |
| SBP, mmHg                                               | 146.07 ± 16.65        | 146.17 ± 16.79                    | 145.98 ± 16.52                   | .612           |
| DBP, mmHg                                               | 82.47 ± 10.60         | 82.66 ± 10.67                     | 82.29 ± 10.52                    | .117           |
| ALT, U/L                                                | 18.36 ± 11.79         | 18.48 ± 11.67                     | 18.24 ± 11.90                    | .355           |
| AST, U/L                                                | 23.56 ± 9.82          | 23.71 ± 10.15                     | 23.41 ± 9.47                     | .173           |
| Urea umol/L                                             | 5.66 ± 1.34           | 5.68 ± 1.35                       | 5.64 ± 1.32                      | .139           |
| CR, umol/L                                              | 73.24 ± 18.00         | 73.12 ± 17.84                     | 73.35 ± 18.17                    | .557           |
| Fasting serum glucose, umol/L                           | 6.13 ± 1.59           | 6.09 ± 1.58                       | 6.17 ± 1.60                      | .035           |
| Uric acid, mmol/L                                       | 347.26 ± 89.15        | 347.58 ± 88.68                    | 346.95 ± 89.62                   | .750           |
| Triglycerides, mmol/L                                   | 4.88 ± 1.08           | 4.89 ± 1.11                       | 4.88 ± 1.06                      | .692           |
| Total cholesterol, mmol/L                               | 1.60 ± 1.07           | 1.61 ± 1.13                       | 1.58 ± 1.02                      | .335           |
| HDL-C, mmol/L                                           | 1.26 ± 0.31           | 1.26 ± 0.31                       | 1.26 ± 0.30                      | .622           |
| LDL-C, mmol/L                                           | 2.69 ± 0.88           | 2.68 ± 0.88                       | 2.69 ± 0.87                      | .649           |
| Diabetes mellitus history                               | 1586 (19.1)           | 779 (18.9)                        | 807 (19.4)                       | .553           |
| Hyperlipidemia history                                  | 3052 (36.8)           | 1556 (37.7)                       | 1496 (35.9)                      | .111           |
| Framingham score                                        | 28.59 (16.33)         | 28.60 (16.28)                     | 28.58 (16.38)                    | .945           |
| Framingham Risk Score ≥15%<br>no./total no <sup>c</sup> | 6422 ± 77.7           | 3200 ± 77.7                       | 3222 ± 77.7                      | .999           |
| eGFR                                                    | 109.28 ± 24.05        | 109.61 ± 24.14                    | 108.96 ± 23.95                   | .218           |

ALT, alanine aminotransferase; AST, aspartate aminotransferase; BMI, body mass index; CR, creatinine; SBP, systolic blood pressure; DBP, diastolic blood pressure; eGFR, estimated glomerular filtration rate; HDL-C, high-density lipoprotein cholesterol; LDL-C, low-density lipoprotein cholesterol. Values are expressed as No. (%) or mean ± standard deviation. Percentages may not add up to 100 because of rounding. To convert the values for fasting serum glucose to milligrams per deciliter, divide by 0.05551. To convert the values for cholesterol to milligrams per deciliter, divide by 0.02586. To convert the values for triglycerides to milligrams per deciliter, divide by 0.01129. IQR denotes interquartile range.

<sup>a</sup> Body-mass index is weight in kilograms divided by height in meters squared.

<sup>b</sup> P value < .05.

<sup>c</sup> A Framingham Risk Score of 15% or higher indicates a high 10-year risk of cardiovascular disease.

**Table 2 of the supplementary data.** Hazard ratios for the primary and secondary outcomes

| Outcome                              | Intensive treatment (n = 4132) |            | Standard treatment (n = 4162) |            | SHR (95%CI)       | P     |
|--------------------------------------|--------------------------------|------------|-------------------------------|------------|-------------------|-------|
|                                      | No. of patients, %             | % per year | No. of patients, %            | % per year |                   |       |
|                                      |                                |            |                               |            |                   |       |
| <b>Primary composite outcome</b>     | 144 (3.5)                      | 1.0        | 192 (4.6)                     | 1.4        | 0.74 (0.60-0.93)  | .007* |
| <b>Secondary outcomes</b>            |                                |            |                               |            |                   |       |
| <i>Components of primary outcome</i> |                                |            |                               |            |                   |       |
| Stroke                               | 47 (1.1)                       | .3         | 71 (1.7)                      | 0.5        | 0.66 (0.46, 0.95) | .027* |
| Acute coronary syndrome              | 55 (1.3)                       | .4         | 80 (1.9)                      | 0.6        | 0.68 (0.49, 0.96) | .030* |
| <i>Mortality</i>                     |                                |            |                               |            |                   |       |
| Death from cardiovascular cause      | 18 (0.4)                       | .1         | 22 (0.5)                      | 0.2        | 0.82 (0.44, 1.52) | .524  |
|                                      |                                |            |                               |            | HR (95% CI)       |       |
| Death from any cause                 | 66 (1.6)                       | .5         | 60 (1.4)                      | 0.4        | 1.10 (0.78, 1.57) | .579  |

CI, confidence interval; HR, hazard ratio; SHR, subdistribution hazard ratio.

The primary outcome was a composite of acute coronary syndrome, stroke, acute decompensated heart failure, coronary revascularization, atrial fibrillation, or mortality from cardiovascular cause.

In the analyses of the primary outcome and secondary outcomes (excluding all-cause death), hazard ratio (95% confidence interval) and P value were calculated using the Fine–Gray subdistribution hazard model. In the analysis of all-cause death, the Cox regression model was used.

\*P < .05.

Table 3 of the supplementary data

| Outcomes                       | Intensive treatment |                  |                       | Standard treatment |                  |                       | Crude model                               |                    | Adjusted model 1 <sup>a</sup>             |                    |
|--------------------------------|---------------------|------------------|-----------------------|--------------------|------------------|-----------------------|-------------------------------------------|--------------------|-------------------------------------------|--------------------|
|                                | Total number        | No. of events, % | % with event per year | Total number       | No. of events, % | % with event per year |                                           | P                  |                                           | P                  |
| <b>Second Outcomes</b>         |                     |                  |                       |                    |                  |                       |                                           |                    |                                           |                    |
| <i>Stroke</i>                  |                     |                  |                       |                    |                  |                       | SHR                                       |                    | SHR                                       |                    |
| Tertile 1 (n = 2762)           | 1355                | 7                | 0.16                  | 1407               | 22               | 0.47                  | 0.326 (0.140-0.763)                       | .010 <sup>b</sup>  | 0.353 (0.151-0.828)                       | .017 <sup>b</sup>  |
| Tertile 2 (n = 2766)           | 1393                | 20               | 0.43                  | 1373               | 27               | 0.59                  | 0.721 (0.404-1.285)                       | .267               | 0.697 (0.391-1.244)                       | .222               |
| Tertile 3 (n = 2766)           | 1384                | 20               | 0.43                  | 1382               | 22               | 0.48                  | 0.898 (0.490-1.644)                       | .726               | 0.905 (0.494-1.659)                       | .746               |
| <i>Cardiovascular death</i>    |                     |                  |                       |                    |                  |                       | SHR                                       |                    | SHR                                       |                    |
| Tertile 1 (n = 2762)           | 1355                | 5                | 0.11                  | 1407               | 4                | 0.08                  | 1.294 (0.348-4.808)                       | .701               | 1.268 (0.338-4.752)                       | .725               |
| Tertile 2 (n = 2766)           | 1393                | 7                | 0.15                  | 1373               | 8                | 0.17                  | 0.857 (0.311-2.361)                       | .765               | 0.834 (0.307-2.263)                       | .721               |
| Tertile 3 (n = 2766)           | 1384                | 6                | 0.13                  | 1382               | 10               | 0.22                  | 0.592 (0.215-1.630)                       | .311               | 0.595 (0.215-1.644)                       | .317               |
| <i>Acute coronary syndrome</i> |                     |                  |                       |                    |                  |                       | SHR                                       |                    | SHR                                       |                    |
| Tertile 1 (n = 2762)           | 1355                | 11               | 0.24                  | 1407               | 25               | 0.53                  | 0.450 (0.222-0.915)                       | .027 <sup>b</sup>  | 0.448 (0.221-0.909)                       | .026 <sup>b</sup>  |
| Tertile 2 (n = 2766)           | 1393                | 21               | 0.45                  | 1373               | 27               | 0.59                  | 0.758 (0.429-1.339)                       | .340               | 0.753 (0.427-1.329)                       | .327               |
| Tertile 3 (n = 2766)           | 1384                | 23               | 0.50                  | 1382               | 28               | 0.61                  | 0.814 (0.469-1.412)                       | .464               | 0.817 (0.472-1.417)                       | .472               |
| <i>Heart failure</i>           |                     |                  |                       |                    |                  |                       | SHR                                       |                    | SHR                                       |                    |
| Tertile 1 (n = 2762)           | 1355                | 0                | 0                     | 1407               | 3                | 0.06                  | 1.729 (0.557- 5.365) <sup>b</sup><br>e-09 | <.001 <sup>b</sup> | 1.681 (0.542- 5.220) <sup>b</sup><br>e-09 | <.001 <sup>b</sup> |
| Tertile 2 (n = 2766)           | 1393                | 0                | 0                     | 1373               | 3                | 0.07                  | 1.641 (0.529-5.093) <sup>b</sup><br>e-09  | <.001 <sup>b</sup> | 1.624 (0.523-5.024) <sup>b</sup><br>e-09  | <.001 <sup>b</sup> |
| Tertile 3 (n = 2766)           | 1384                | 2                | 0.04                  | 1382               | 5                | 0.11                  | 0.395 (0.077-2.040)                       | .268               | 0.399 (0.077-2.055)                       | .272               |
| <i>All-cause death</i>         |                     |                  |                       |                    |                  |                       | HR                                        |                    | HR                                        |                    |
| Tertile 1 (n = 2762)           | 1355                | 18               | 0.40                  | 1407               | 20               | 0.43                  | 0.948 (0.501-1.793)                       | .869               | 0.977 (0.515-1.852)                       | .943               |
| Tertile 2 (n = 2766)           | 1393                | 20               | 0.43                  | 1373               | 14               | 0.31                  | 1.383 (0.698-2.739)                       | .352               | 1.352 (0.682-2.680)                       | .388               |
| Tertile 3 (n = 2766)           | 1384                | 28               | 0.60                  | 1382               | 26               | 0.56                  | 1.066 (0.625-1.818)                       | .814               | 1.075 (0.630-1.833)                       | .791               |

CI, confidence interval; HR, hazard ratio; SHR, subdistribution hazard ratio.

In the analyses of the primary outcome and secondary outcomes (excluding all-cause death), hazard ratio (95% confidence interval) and P value were calculated using the Fine-Gray subdistribution hazard model. In the analysis of all-cause death, the Cox regression model was used.

<sup>a</sup>Adjustment for fasting serum glucose.

<sup>b</sup>P < .05.

Table 4 of the supplementary data.

| Outcome                              | <i>P</i> |
|--------------------------------------|----------|
| <b>Primary composite outcome</b>     | .120     |
| <b>Secondary outcomes</b>            |          |
| <i>Components of primary outcome</i> |          |
| Stroke                               | .051     |
| Acute coronary syndrome              | .217     |
| <i>Mortality</i>                     |          |
| Death from cardiovascular cause      | .069     |
| Death from any cause                 | .697     |

The interaction *P* values were calculated using Cox regression for all-cause mortality, and Fine-Gray regression for other primary and secondary outcomes. The interactions between treatment with uric acid as continuous endpoints.
